# Supplementary material for: Nitroxide-Mediated Controlled Radical Copolymerization of α-Trifluoromethylstyrenes with Styrenes
Source: MDPI journal article supplement (doi:10.3390/molecules29061214), 2024-03-08
Supplement: s1 [file s1]

## Supporting Information

### Nitroxide-Mediated Controlled Radical Copolymerization of $\alpha$ - Trifluoromethylstyrenes with styrenes

Tadashi Kanbara, Yuriko Ito, Airi Yamaguchi, Tomoko Yajima

Department of Chemistry, Ochanomizu University, 2-1-1, Otsuka, Bunkyo-ku, Tokyo  
112-8610, Japan

#### *Table of contents*

|                                                                   |    |
|-------------------------------------------------------------------|----|
| 1. Synthesis of monomers                                          | S2 |
| 2. Determination of ST and TMSMST composition ratio in copolymers | S3 |
| 3. Plot of TFMST ratio of monomer vs polymer.                     | S5 |
| 4. Time course of copolymerization                                | S6 |
| 5. TG curves                                                      | S7 |
| 6. TG-GC-MS                                                       | S8 |
| 7. Water and oil repellency                                       | S9 |

## 1. Synthesis of monomers

Monomers were synthesized according to the literature. [1,2]

To a 100 mL flask equipped with a magnetic stir bar was added arylboronic acid (8 mmol), 2-bromo-3,3,3-trifluoropropene (1.65 mL, 16 mmol), dry THF (24 mL), K<sub>2</sub>CO<sub>3</sub> (2.0 M, 16 mL) and PdCl<sub>2</sub>(PPh<sub>3</sub>)<sub>2</sub> (168 mg, 0.24 mmol). The mixture was frozen-degassed with liquid nitrogen and vacuum evacuation ( $\times$  3). After dissolution, the reaction vessel was injected argon. The resulting solution was stirred at 65 °C for 24 h. After reaction mixture was cooled to room temperature, the mixture was quenched with saturated aqueous NH<sub>4</sub>Cl, extracted with Et<sub>2</sub>O, dried over Na<sub>2</sub>SO<sub>4</sub>, filtered, and concentrated under pressure. After removing the solvent, the crude product was purified by distillation under reduced pressure (pressure: 20 mbar, bath temperature: 90 °C) to obtain a colorless oil. Compounds were identified according to the literature. [3-5]

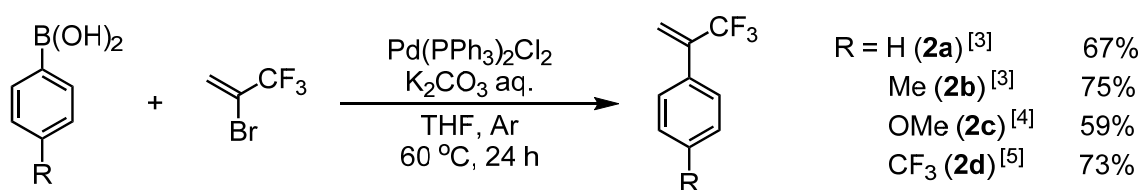

**Scheme S1.** Synthesis of monomers.

[1] Liu Y., Zhou Y., Zhao Y., Qu J., *Org. Lett.*, **2017**, 19, 946–949.

[2] J. Walkowiak-Kulikowska, F. Boschet, G. Kostov, V. Gouverneur, B. Ameduri, *Eur. Polym. J.*, **2016**, 84, 612–621.

[3] R. Pan, X. Liu, M. Deng, *J. Fluor. Chem.*, **1999**, 95, 167–170.

[4] Miura T., Ito Y., Murakami M., *Chem. Lett.*, **2008**, 37, 1006–1007.

[5] Nader B. S., Cordova J. A., Reese K. E., Powell C. L., *J. Org. Chem.*, **1994**, 59, 2898–2901.

## 2. Determination of ST and TFMST composition ratio in copolymers

Using a known weight of benzotrifluoride (BTF) as an internal standard for  $^{19}\text{F}$  NMR studies, ST and TFMST composition ratio was calculated by comparison of the integrated values of  $\text{CF}_3$  of BTF and  $\text{CF}_3$  of TFMST in copolymer.

$$\text{Mol\% of TFMST in the copolymer} \quad \%_{\text{TFMST}} = A * 100$$

$$\text{Mol\% of ST in the copolymer} \quad \%_{\text{ST}} = (1-A) * 100$$

With

$$\frac{m_{\text{copolym}} * \frac{M_{\text{TFMST}} \times A}{M_{\text{TFMST}} \times A + M_{\text{ST}} \times (1 - A)}}{M_{\text{TFMST}}} = n_{\text{TFMST}}$$

Where

$$n_{\text{TFMST}} = n_{\text{BTF}} \times \frac{I_{\text{copolym}}}{I_{\text{BTF}}}$$

$m_{\text{copolym}}$  Measured polymer weight (mg)

$M_{\text{TFMST}}, M_{\text{ST}}$  : Molecular weigh

$n_{\text{TFMST}}, n_{\text{BTF}}$  (mmol)

$I_{\text{copolym}}, I_{\text{BTF}}$ : Integrated value

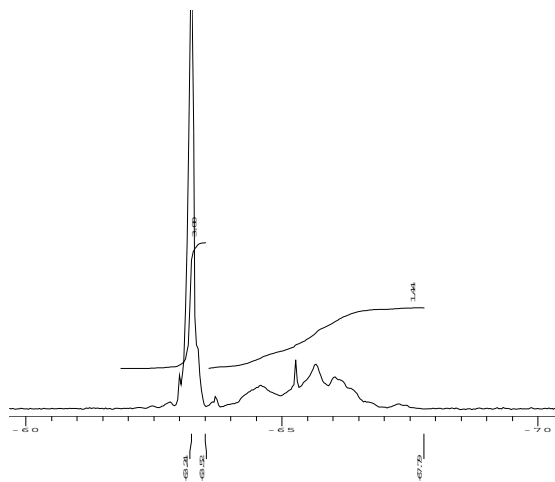

**Figure S1.** Example of  $^{19}\text{F}$  NMR spectra ( $\text{CDCl}_3$ ) of synthesized polymer.

| Polymer          | $m_{\text{copoly}}^{\text{m}}$<br>[mg] | $M_{\text{TFMST}}$ | $M_{\text{ST}}$ | $n_{\text{TFMST}}$<br>[mmol] | $n_{\text{BTF}}$<br>[mmol] | $I_{\text{copoly}}$ | $I_{\text{BTF}}$ | A     |
|------------------|----------------------------------------|--------------------|-----------------|------------------------------|----------------------------|---------------------|------------------|-------|
| Table 2, Entry 2 | 137.2                                  | 172.15             | 104.15          | 0.120                        | 0.140                      | 2.50                | 3.00             | 0.090 |
| Table 2, Entry 3 | 13.6                                   | 172.15             | 104.15          | 0.0206                       | 0.0712                     | 0.87                | 3.00             | 0.176 |
| Table 2, Entry 4 | 11.7                                   | 172.15             | 104.15          | 0.0309                       | 0.0643                     | 1.44                | 3.00             | 0.335 |
| Table 2, Entry 5 | 14.1                                   | 172.15             | 104.15          | 0.0430                       | 0.121                      | 1.07                | 3.00             | 0.400 |
| Table 3, Entry 1 | 21.6                                   | 172.15             | 134.18          | 0.0462                       | 0.0671                     | 2.07                | 3.00             | 0.310 |
| Table 3, Entry 2 | 11.0                                   | 172.15             | 172.15          | 0.0147                       | 0.107                      | 3.00                | 21.78            | 0.230 |
| Table 3, Entry 3 | 35.5                                   | 172.15             | 194.10          | 0.0562                       | 0.0958                     | 1.76                | 3.00             | 0.297 |
| Table 4, Entry 1 | 10.2                                   | 186.17             | 104.15          | 0.0221                       | 0.120                      | 0.55                | 3.00             | 0.270 |
| Table 4, Entry 2 | 14.9                                   | 202.17             | 104.15          | 0.0348                       | 0.0704                     | 1.48                | 3.00             | 0.315 |
| Table 4, Entry 3 | 12.8                                   | 240.15             | 104.15          | 0.0266                       | 0.107                      | 3.00                | 12.14            | 0.301 |

**Table S1.** The data used to determine the molar composition of the polymers.

**3. Plot of TFMST ratio of monomer vs polymer.**

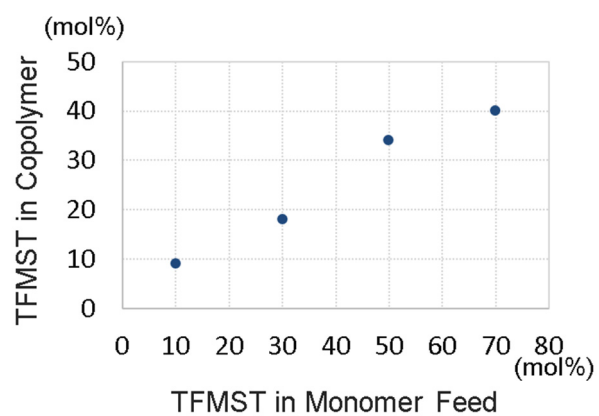

Figure S2. TFMST ratio in monomer vs polymer.

#### 4. Time course of copolymerization.

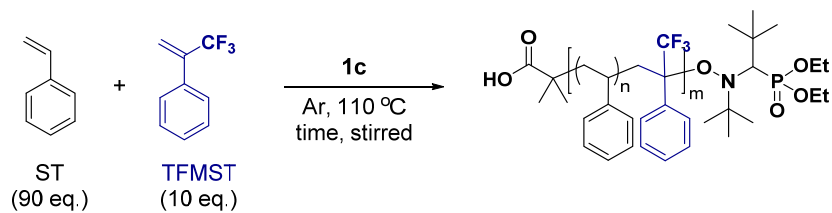

| time | $M_n^a)$<br>( $\times 10^3$ ) | $M_w / M_n^a)$ | Residual Monomer<br>Ratio (mol%) <sup>b)</sup> |       |
|------|-------------------------------|----------------|------------------------------------------------|-------|
|      |                               |                | ST                                             | TFMST |
| 0 h  | -                             | -              | 90                                             | 10    |
| 1 h  | 1.5                           | 1.39           | 90                                             | 10    |
| 3 h  | 3.4                           | 1.21           | 90                                             | 10    |
| 6 h  | 5.2                           | 1.21           | 91                                             | 9     |
| 9 h  | 7.0                           | 1.20           | 91                                             | 9     |
| 12 h | 8.3                           | 1.21           | 91                                             | 9     |
| 24 h | 11.2                          | 1.22           | n.d.                                           | n.d.  |

a) Determined by GPC in THF, based on linear PSt as calibration standards. b) Determined by  $^1\text{H}$  NMR.

**Table S2.** Time course of polymerization using 90 mol% of ST.

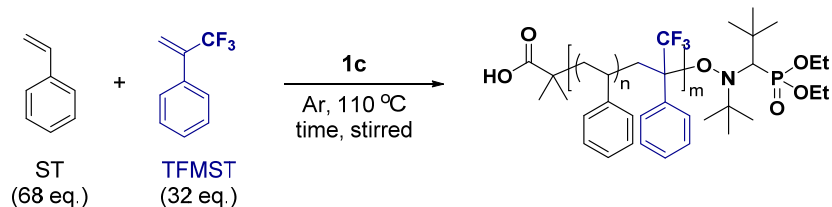

| time | $M_n^a)$<br>( $\times 10^3$ ) | $M_w / M_n^a)$ | Residual Monomer<br>Ratio (mol%) <sup>b)</sup> |       |
|------|-------------------------------|----------------|------------------------------------------------|-------|
|      |                               |                | ST                                             | TFMST |
| 0 h  | -                             | -              | 68                                             | 32    |
| 1 h  | 1.1                           | 1.68           | 67                                             | 33    |
| 3 h  | 2.9                           | 1.36           | 66                                             | 34    |
| 6 h  | 4.3                           | 1.33           | 65                                             | 35    |
| 9 h  | 5.6                           | 1.30           | 64                                             | 36    |
| 12 h | 5.9                           | 1.39           | 62                                             | 38    |
| 24 h | 8.4                           | 1.39           | 56                                             | 44    |

a) Determined by GPC in THF, based on linear PSt as calibration standards. b) Determined by  $^1\text{H}$  NMR.

**Table S3.** Time course of polymerization using 68 mol% of ST.

## 5. TG curves.

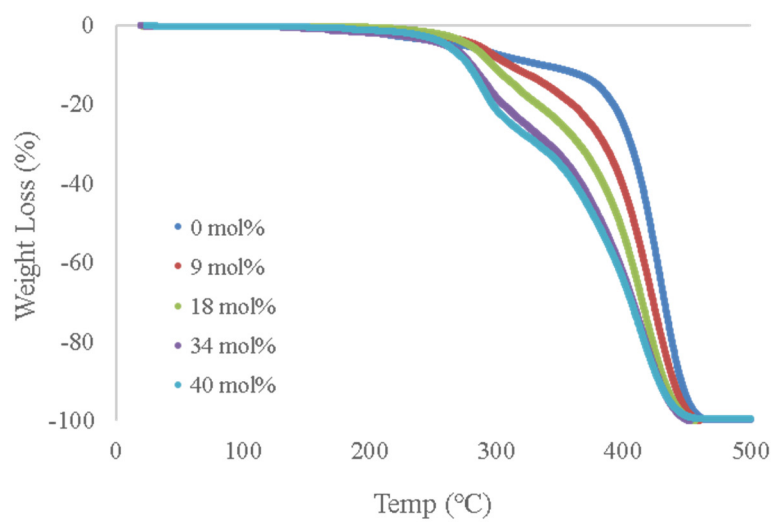

**Figure S3.** TG curves with different TFMST content.

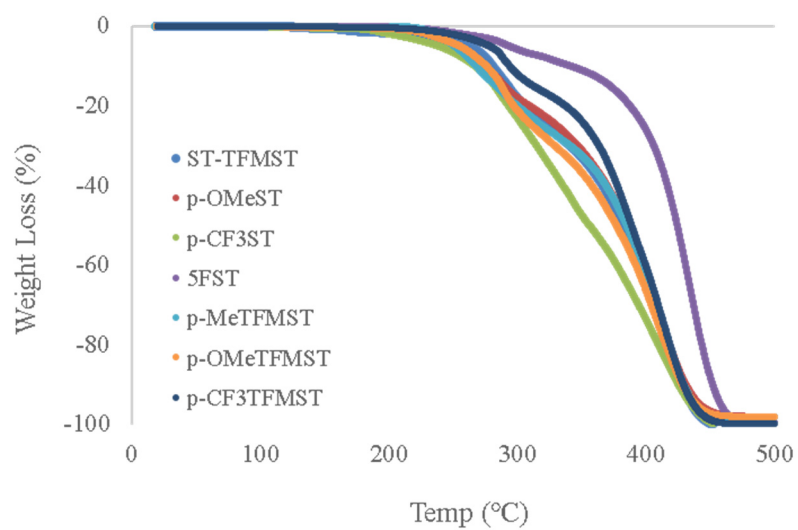

**Figure S4.** TG curves with different substituent.

## 6. TG-GC-MS

Procedure of thermogravimetric (TG) (NETZSCH STA2500 Regulus) coupled with a gas chromatography-mass spectrometry (GC/MS) was used to carry out pyrolysis/combustion experiments. 1.3 mg sample (Table 2, entry 5) is pyrolyzed/combusted in the TG at temperatures between 30 °C and 600 °C with a heating rate of 10 °C/min. N<sub>2</sub> gas with a flow rate of 100 mL/min was used as the carrier gas to create an inert atmosphere in pyrolysis process. The evolved gases at a target temperature (300 °C for inert atmosphere that corresponding to the maximum mass loss rate) was sampled via an autoinjector system that is connected with the TG system. The remainder of the gas is purged to the atmosphere. All transfer lines of the autoinjector are maintained at 300 °C to avoid any condensation of volatile gases whose boiling temperature is less than 300 °C. Gas analysis is carried out with a gas chromatography-mass spectrometry (GC/MS) (Agilent 8890 GC system JMS-Q1600GC for GC, JMS-Q1500GC Master-Quad GC/MS for MS). The GC instrument is equipped with HP-5MS (5%-phenyl)-methylpolysiloxane nonpolar (15 m length, 0.25 mm I.D. and 0.25 µm film) and HP-MOLESIEVE (30 m length, 0.53 mm I.D.) column. The initial oven temperature of 40 °C is kept isothermal for 3 min, then heated to 600 °C at a rate of 10 °C/min, and held at 600 °C for 5 min. The temperatures of the MS source and MS quad are 300 and 150 °C, respectively. The detector consists of a mass selective detector and electron impact mass spectra are acquired with 70 eV ionizing energy with a scanning range from 10 to 1000 Da and with a scan rate of 1 scans s<sup>-1</sup>. The MS transfer line and the ion source temperature are maintained at 300 °C. The chromatographic peaks are identified according to the National Institute of Standards and Technology (NIST) mass spectral data library.

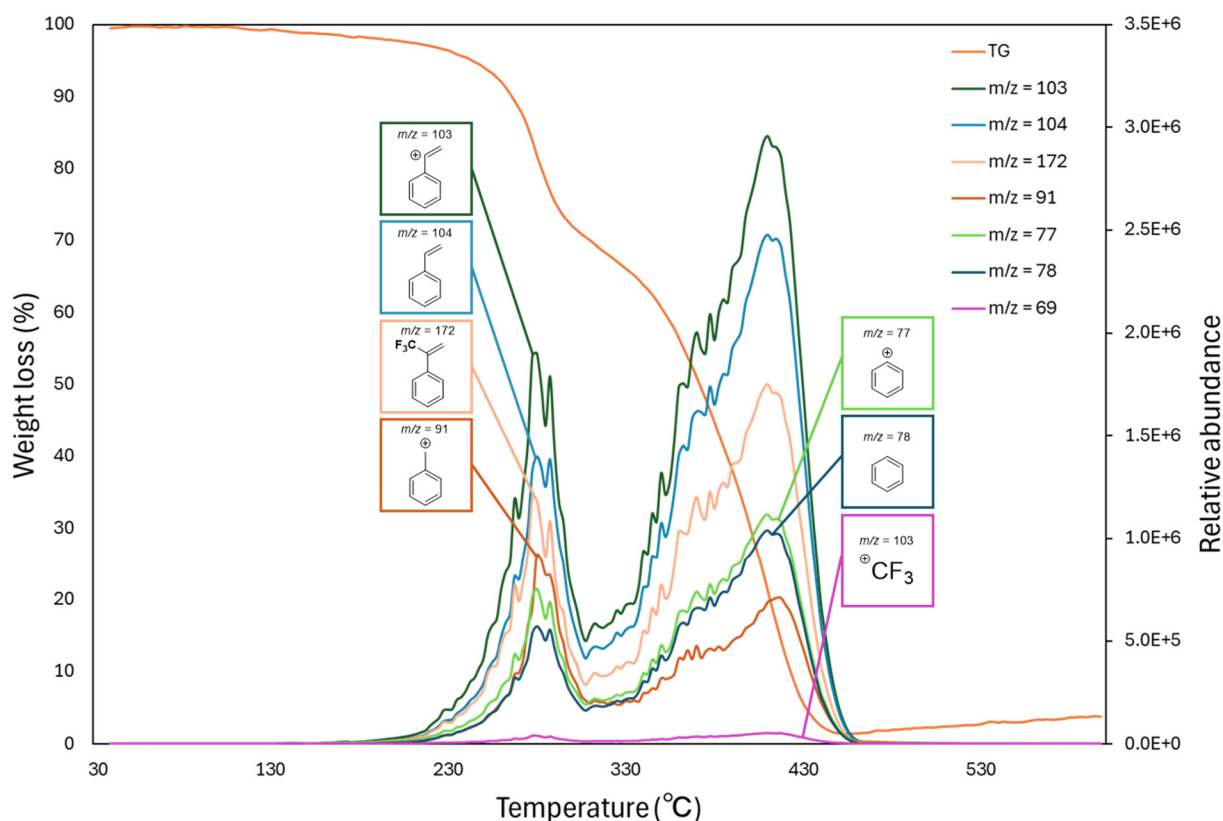

Figure S5. TG-GC-MS in mass spectrum.



## 7. Water and oil repellency.

Fluorine content was calculated using the following formula.

$$\text{Fluorine content (\%)} = \frac{(M_n - M_{\text{terminal site}}) \times \frac{N_{\text{fluorine}} \times M_{\text{fluorine}}}{M_{\text{unit}}}}{M_n}$$

Where

$M_{\text{terminal site}}$  : Molecular weight of terminal site of polymers

$N_{\text{fluorine}}$  : Numer of fluorine atoms per unit

$M_{\text{fluorine}}$  : Molecular weight of fluorine

$M_{\text{unit}}$  : Molecular weight of unit

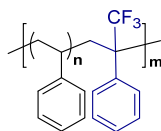

| Polymerization methods | Composition of polymer |           | Fluorine content (wt%) | Contact angle (degree) |          |
|------------------------|------------------------|-----------|------------------------|------------------------|----------|
|                        | ST (%)                 | TFMST (%) |                        | Water                  | Dodecane |
| ATRP                   | 91                     | 9         | 5                      | 88                     | 8        |
| RAFT                   | 87                     | 13        | 6                      | 93                     | 10       |

**Table S4.** Static contact angle measurements of polymers with different polymerization methods.

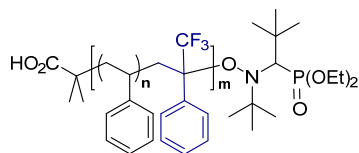

| Composition of polymer |           | Fluorine content<br>(wt%) | Contact angle (degree) |          |
|------------------------|-----------|---------------------------|------------------------|----------|
| ST (%)                 | TFMST (%) |                           | Water                  | Dodecane |
| 100                    | 0         | 0                         | 88                     | 6        |
| 91                     | 9         | 5                         | 92                     | 6        |
| 82                     | 18        | 9                         | 92                     | 8        |
| 66                     | 34        | 15                        | 97                     | 8        |
| 60                     | 40        | 17                        | 93                     | 8        |

**Table S5.** Static contact angle measurements of polymers with different ratio of TFMST.

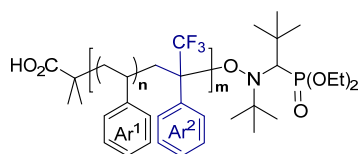

| Ar <sup>1</sup> | Ar <sup>2</sup> | Composition<br>of polymer<br>Ar <sup>1</sup> :Ar <sup>2</sup> | Fluorine<br>content<br>(wt%) | Contact angle (degree) |          |
|-----------------|-----------------|---------------------------------------------------------------|------------------------------|------------------------|----------|
|                 |                 |                                                               |                              | Water                  | Dodecane |
|                 |                 | 77 : 23                                                       | 32                           | 97                     | 10       |
|                 |                 | 70 : 30                                                       | 44                           | 105                    | 13       |
|                 |                 | 70 : 30                                                       | 23                           | 99                     | 11       |

**Table S6.** Static contact angle measurements of polymers with different Ar<sup>1</sup> or Ar<sup>2</sup>.
